# Supplementary material for: Specific chromatin landscapes and transcription factors couple breast cancer subtype with metastatic relapse to lung or brain
Source: PubMed Central journal article supplement (PMC7060551; doi:10.1186/s12920-020-0695-0), 2020-03-06

**A****LM2**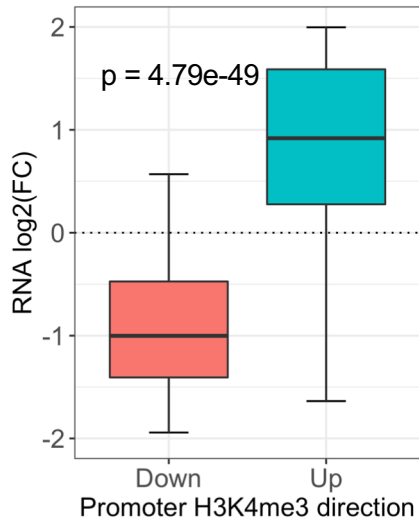**B****BrM2**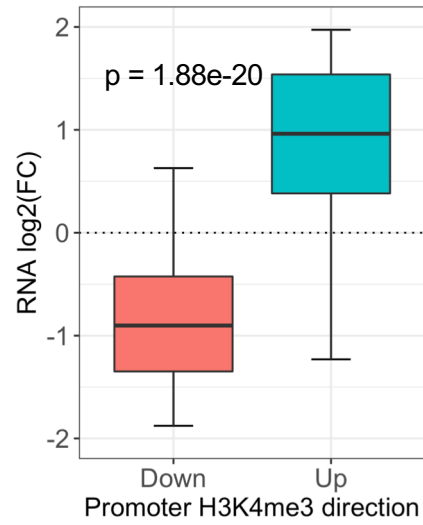**C****LM2**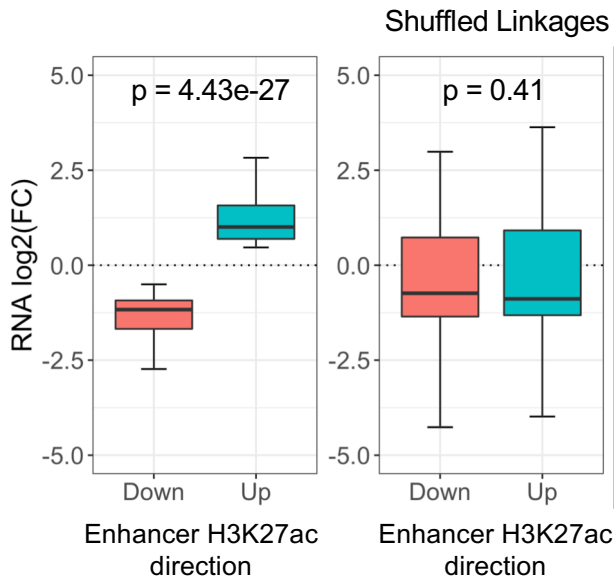**D****BrM2**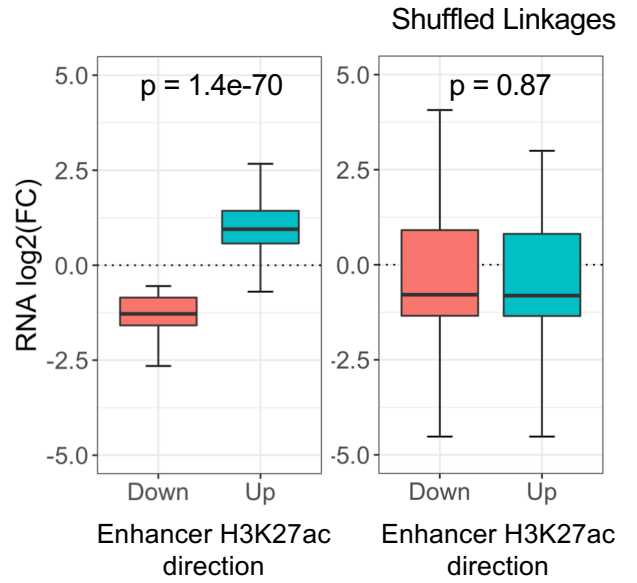

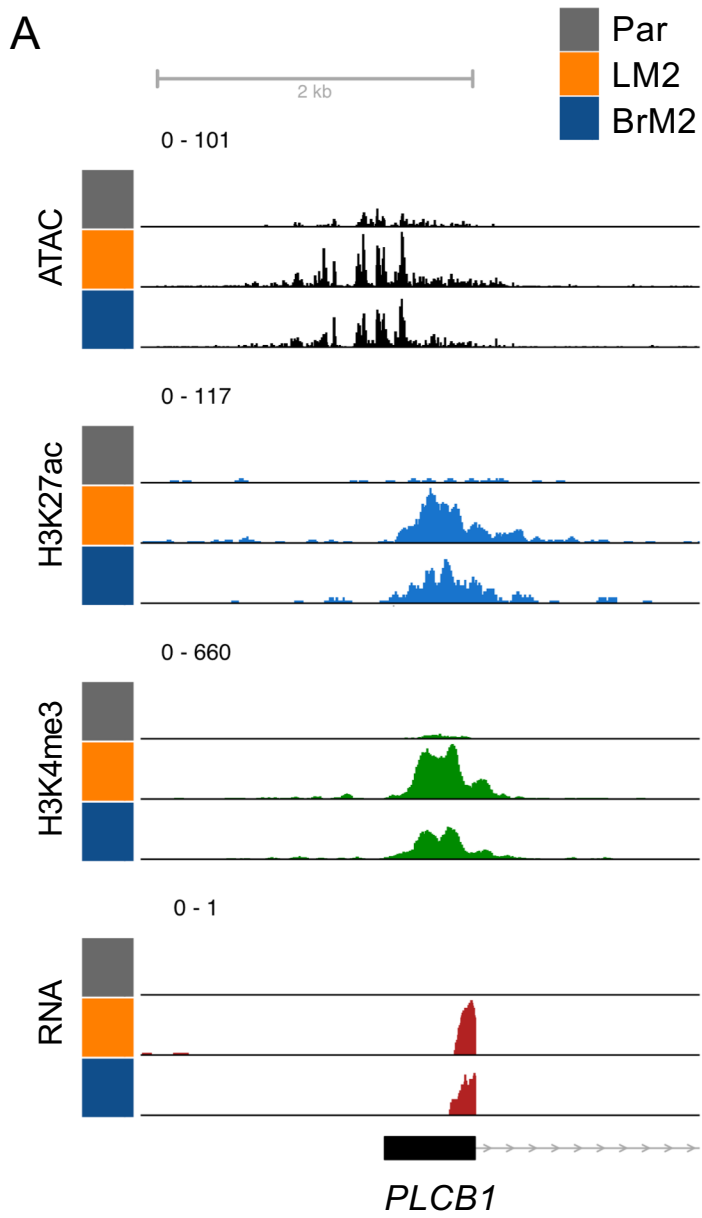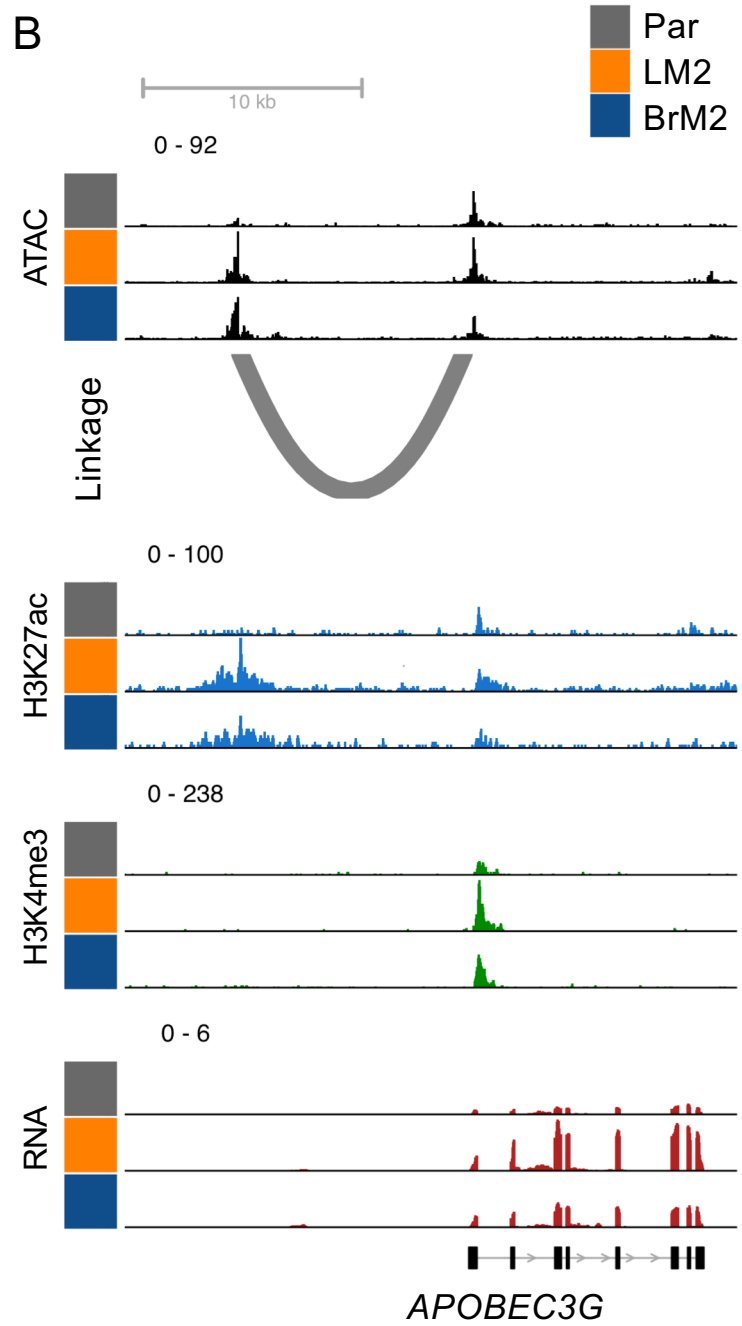

Supplemental Figure 2

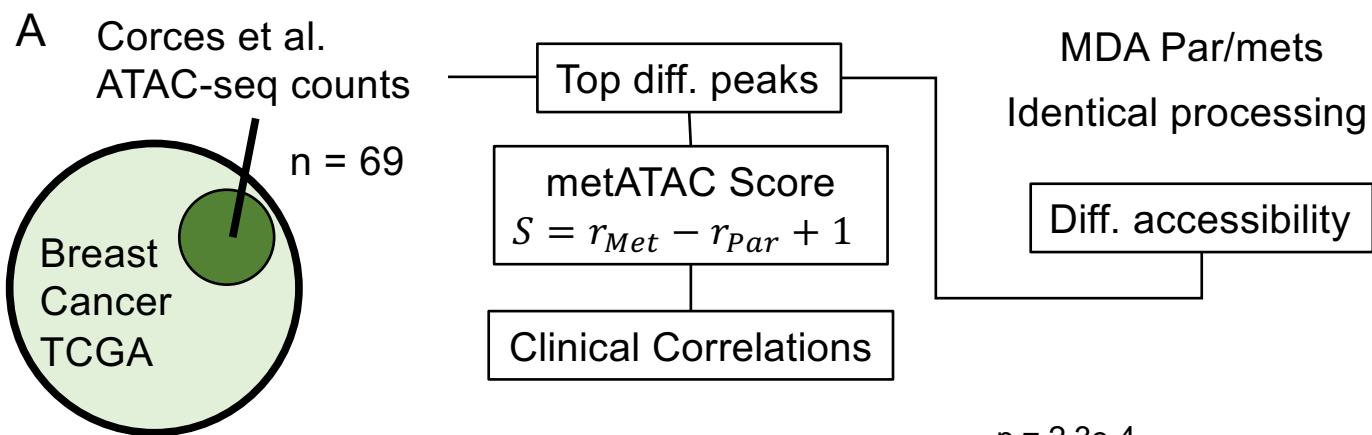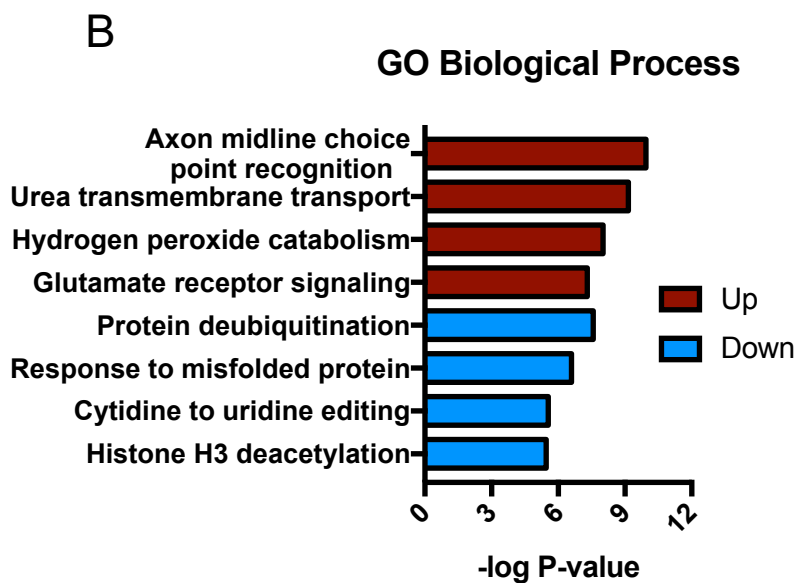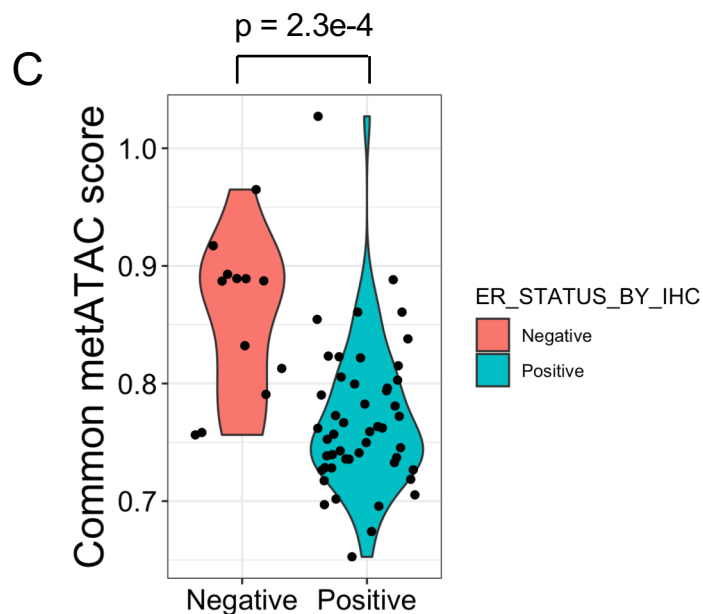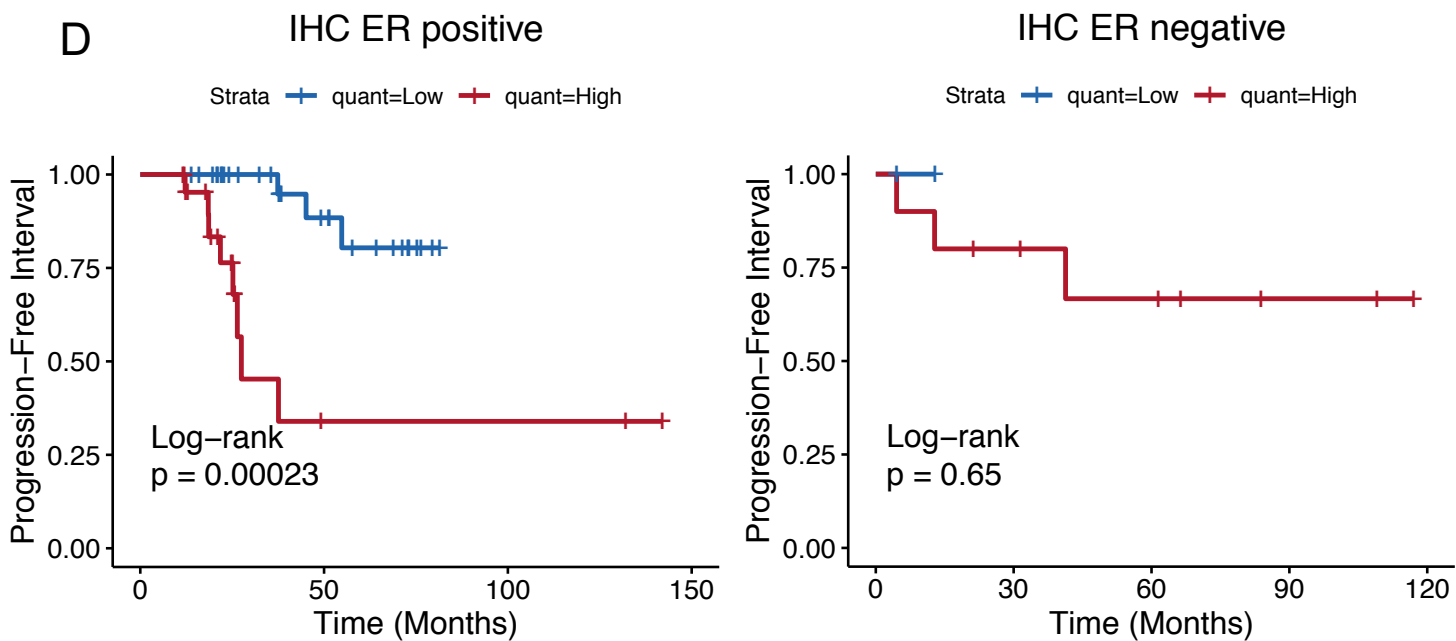

Supplemental Figure 3

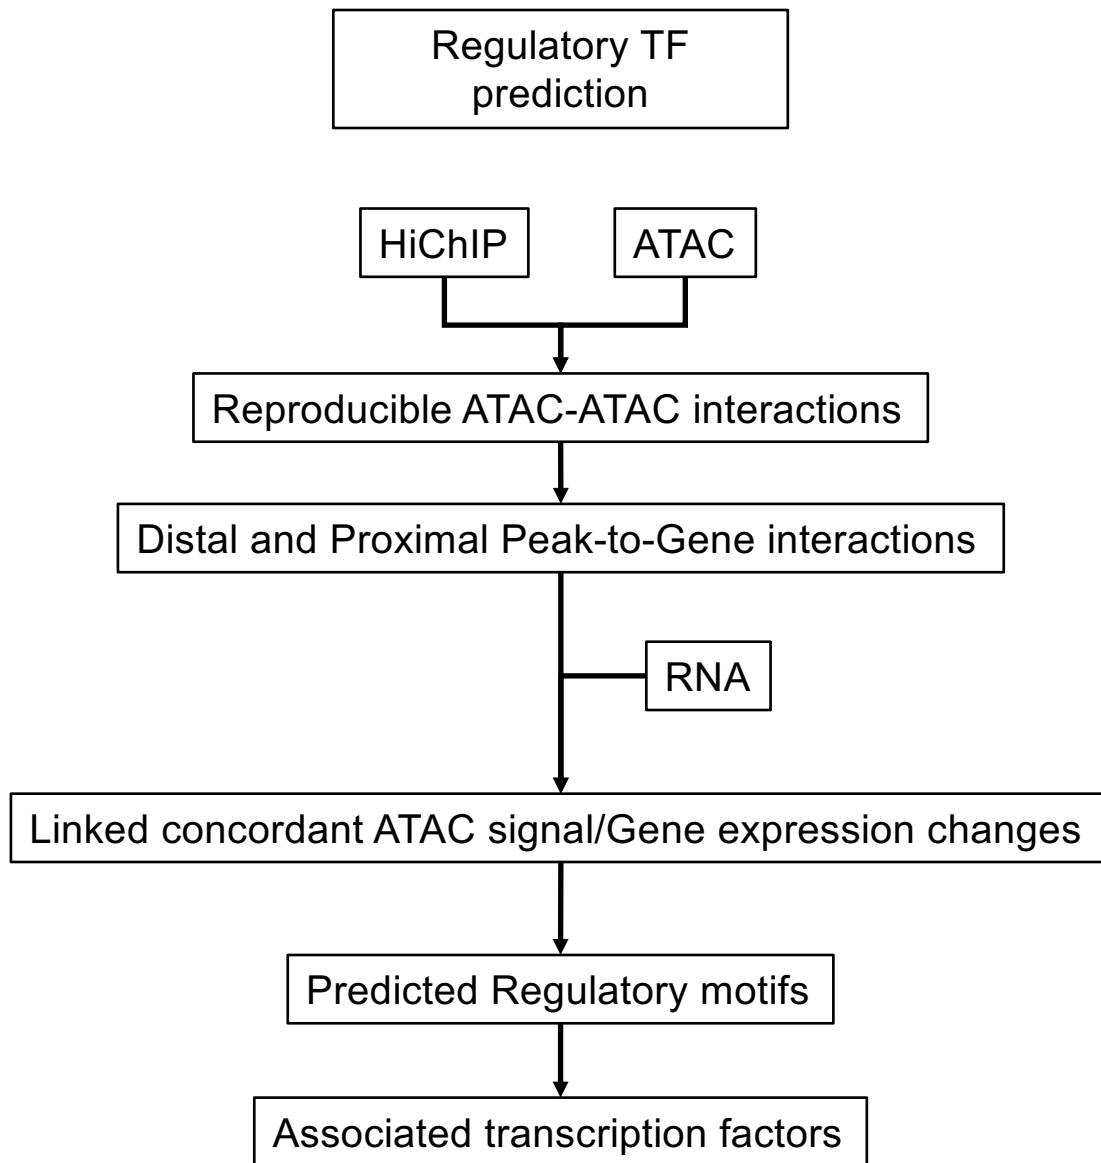

A

| LM2 Gained    | Shared Gained  |               | BrM2 Gained   |               |              | TF Cluster                           |
|---------------|----------------|---------------|---------------|---------------|--------------|--------------------------------------|
| <i>TFAP2A</i> | <i>EHF</i>     | <i>AR</i>     | <i>FOXA1</i>  | <i>BACH1</i>  | <i>ATF4</i>  | AP-2_cluster_6                       |
| <i>TFAP2C</i> | <i>ELF1</i>    | <i>NR3C1</i>  | <i>FOXA2</i>  | <i>BACH2</i>  | <i>CEBPB</i> | HOX-related factors_cluster_10       |
| <i>TFAP2E</i> | <i>ELF2</i>    | <i>NR3C2</i>  | <i>FOXA3</i>  | <i>BATF</i>   | <i>CEBPD</i> | Ets-related factors_cluster_16       |
| <i>HOXB9</i>  | <i>ELF3</i>    | <i>BCL6</i>   | <i>FOXC1</i>  | <i>BATF3</i>  | <i>CEBPG</i> | Steroid hormone (NR3)_cluster_19     |
|               | <i>ELF4</i>    | <i>NFAT5</i>  | <i>FOXF2</i>  | <i>FOS</i>    | <i>DBP</i>   | STAT factors_cluster_24              |
|               | <i>ELK1</i>    | <i>NFATC1</i> | <i>FOXJ2</i>  | <i>FOSL1</i>  | <i>NFIL3</i> | Forkhead box (FOX) factors_cluster_9 |
|               | <i>ELK3</i>    | <i>NFATC2</i> | <i>FOXJ3</i>  | <i>FOSL2</i>  | <i>TEF</i>   | POU domain factors_cluster_23        |
|               | <i>ELK4</i>    | <i>NFATC3</i> | <i>FOXK1</i>  | <i>JDP2</i>   |              | Jun-related factors_cluster_1        |
|               | <i>ERF</i>     | <i>NFATC4</i> | <i>FOXK2</i>  | <i>JUN</i>    |              | TEF-1-related factors_cluster_2      |
|               | <i>ETS1</i>    | <i>RBPJ</i>   | <i>FOXN3</i>  | <i>JUNB</i>   |              | C/EBP-related_cluster_5              |
|               | <i>ETS2</i>    | <i>STAT1</i>  | <i>FOXO1</i>  | <i>JUND</i>   |              |                                      |
|               | <i>ETV1</i>    | <i>STAT3</i>  | <i>FOXO3</i>  | <i>MAFK</i>   |              |                                      |
|               | <i>ETV3</i>    | <i>STAT5A</i> | <i>FOXO4</i>  | <i>NFE2L1</i> |              |                                      |
|               | <i>ETV4</i>    | <i>STAT5B</i> | <i>FOXO6</i>  | <i>NFE2L2</i> |              |                                      |
|               | <i>ETV5</i>    | <i>STAT6</i>  | <i>FOXP1</i>  | <i>HNF4G</i>  |              |                                      |
|               | <i>ETV6</i>    | <i>ZNF75D</i> | <i>FOXP2</i>  | <i>TEAD1</i>  |              |                                      |
|               | <i>GABPA</i>   |               | <i>FOXQ1</i>  | <i>TEAD2</i>  |              |                                      |
|               | <i>SPDEF</i>   |               | <i>LIN54</i>  | <i>TEAD3</i>  |              |                                      |
|               | <i>ZBTB7A</i>  |               | <i>POU2F1</i> | <i>TEAD4</i>  |              |                                      |
|               | <i>ZKSCAN5</i> |               | <i>POU2F2</i> | <i>ZNF684</i> |              |                                      |
|               |                |               | <i>POU3F2</i> |               |              |                                      |

B

| LM2 Lost      |               |                |               | Shared Lost   |              | BrM2 Lost      | TF Cluster                            |
|---------------|---------------|----------------|---------------|---------------|--------------|----------------|---------------------------------------|
| <i>GATA2</i>  | <i>BACH1</i>  | <i>ARNT</i>    | <i>MNT</i>    | <i>RUNX1</i>  | <i>RARA</i>  | <i>SMAD1</i>   | GATA-type zinc fingers_cluster_48     |
| <i>GATA3</i>  | <i>BACH2</i>  | <i>ARNT2</i>   | <i>MYC</i>    | <i>RUNX2</i>  | <i>RARB</i>  | <i>SMAD3</i>   | Nuclear factor 1_cluster_27           |
| <i>GATA6</i>  | <i>BATF</i>   | <i>ARNTL</i>   | <i>NPAS2</i>  | <i>EGR1</i>   | <i>RARG</i>  | <i>SMAD4</i>   | Nuclear factor 1_cluster_44           |
| <i>HLTF</i>   | <i>BATF3</i>  | <i>ATF6</i>    | <i>SREBF1</i> | <i>KLF10</i>  | <i>NR2C2</i> | <i>SMAD5</i>   | Paired-related HD factors_cluster_60  |
| <i>MECOM</i>  | <i>FOS</i>    | <i>BHLHE40</i> | <i>SREBF2</i> | <i>KLF11</i>  | <i>NR2F1</i> | <i>ZSCAN29</i> | Jun-related factors_cluster_77        |
| <i>NFIB</i>   | <i>FOSL1</i>  | <i>BHLHE41</i> | <i>TCFL5</i>  | <i>KLF12</i>  | <i>NR2F6</i> | <i>RFX1</i>    | Jun-related factors_cluster_1         |
| <i>NFIC</i>   | <i>FOSL2</i>  | <i>CLOCK</i>   | <i>TFE3</i>   | <i>KLF13</i>  | <i>RXRB</i>  | <i>RFX2</i>    | TEF-1-related factors_cluster_2       |
| <i>NFIX</i>   | <i>JDP2</i>   | <i>CREB3</i>   | <i>TFEB</i>   | <i>KLF15</i>  | <i>ESRRA</i> | <i>RFX3</i>    | bHLH-ZIP factors_cluster_7            |
| <i>HIC1</i>   | <i>JUN</i>    | <i>CREB3L1</i> | <i>USF1</i>   | <i>KLF16</i>  | <i>NR2C1</i> | <i>RFX5</i>    | CREB-related factors_cluster_18       |
| <i>HIC2</i>   | <i>JUNB</i>   | <i>CREB3L2</i> | <i>USF2</i>   | <i>KLF2</i>   | <i>NR2F2</i> | <i>RFX7</i>    | Runt-related factors_cluster_57       |
| <i>NFIA</i>   | <i>JUND</i>   | <i>CREB3L4</i> | <i>XBP1</i>   | <i>KLF3</i>   | <i>NR4A1</i> | <i>SIX1</i>    | Krüppel-related_cluster_34            |
| <i>THAP1</i>  | <i>MAFK</i>   | <i>HES1</i>    | <i>ATF1</i>   | <i>KLF4</i>   | <i>NR4A2</i> | <i>SIX2</i>    | NR1_cluster_30                        |
| <i>WT1</i>    | <i>NFE2L1</i> | <i>HES2</i>    | <i>ATF2</i>   | <i>KLF5</i>   | <i>NR6A1</i> | <i>TFCP2</i>   | RXR-related (NR2)_cluster_20          |
| <i>ZNF263</i> | <i>NFE2L2</i> | <i>HES6</i>    | <i>ATF3</i>   | <i>KLF6</i>   | <i>RORA</i>  |                | RXR-related (NR2)_cluster_4           |
| <i>ZNF281</i> | <i>HNF4G</i>  | <i>HIF1A</i>   | <i>ATF7</i>   | <i>KLF9</i>   | <i>RORB</i>  |                | RXR-related (NR2)_cluster_46          |
| <i>NRF1</i>   | <i>TEAD1</i>  | <i>MAX</i>     | <i>CREB1</i>  | <i>MAZ</i>    | <i>VDR</i>   |                | NR3_cluster_55                        |
|               | <i>TEAD2</i>  | <i>MITF</i>    | <i>CREB5</i>  | <i>SP1</i>    | <i>ESR2</i>  |                | SMAD factors_cluster_15               |
|               | <i>TEAD3</i>  | <i>MLX</i>     | <i>CREM</i>   | <i>SP2</i>    | <i>PPARG</i> |                | RFX-related factors_cluster_26        |
|               | <i>TEAD4</i>  | <i>MLXIP</i>   | <i>GMEB2</i>  | <i>SP3</i>    |              |                | Grainyhead-related factors_cluster_51 |
|               | <i>ZNF684</i> | <i>MLXIPL</i>  |               | <i>SP4</i>    |              |                |                                       |
|               |               |                |               | <i>ZBTB14</i> |              |                |                                       |
|               |               |                |               | <i>ZNF148</i> |              |                |                                       |
|               |               |                |               | <i>ZNF740</i> |              |                |                                       |

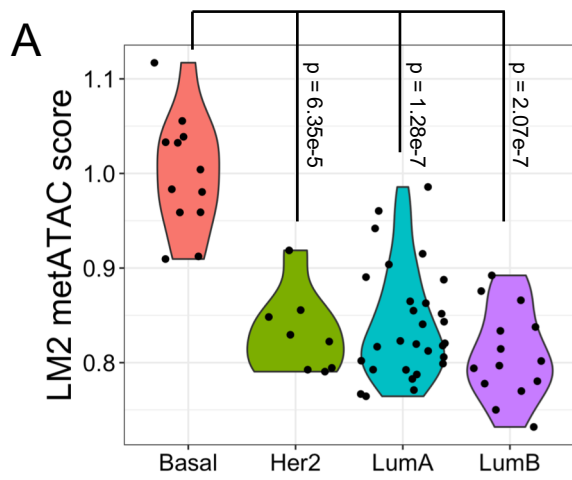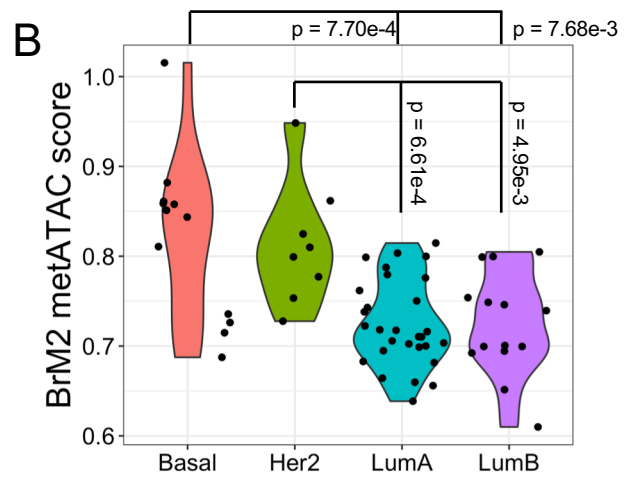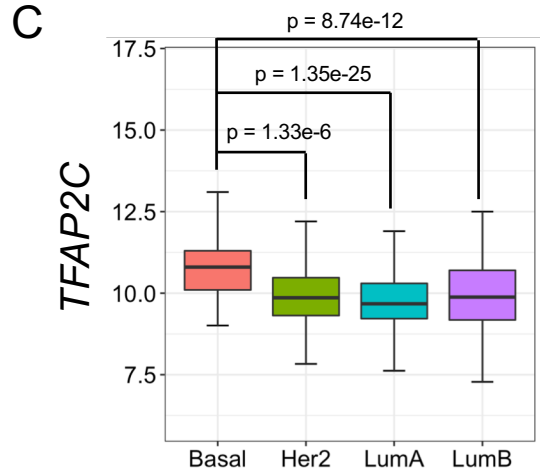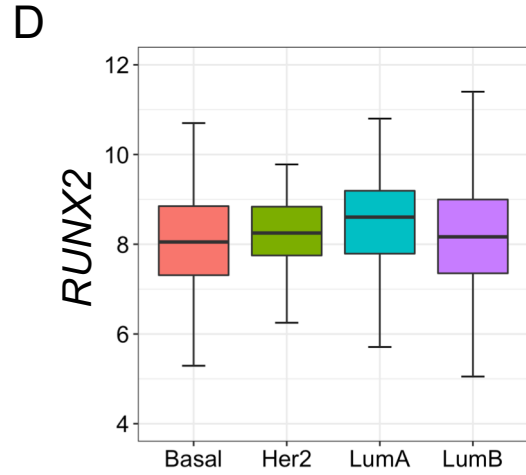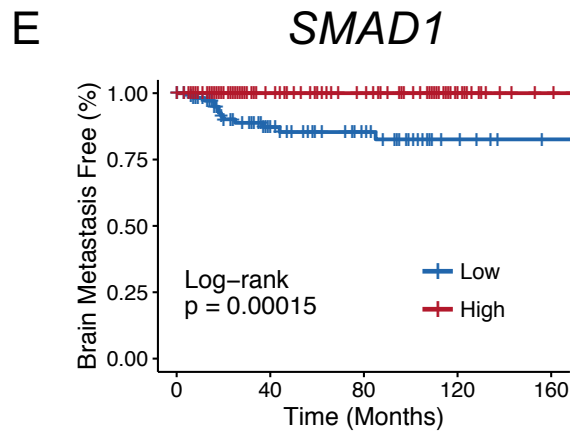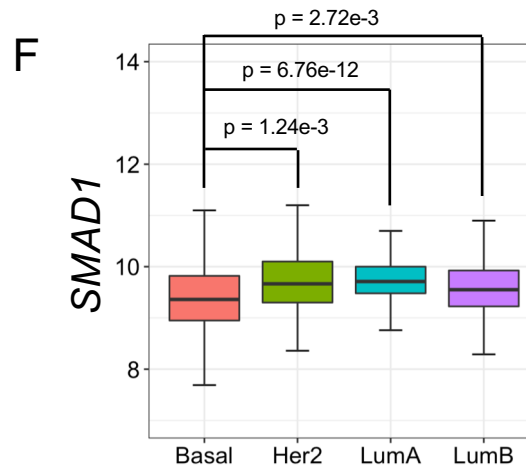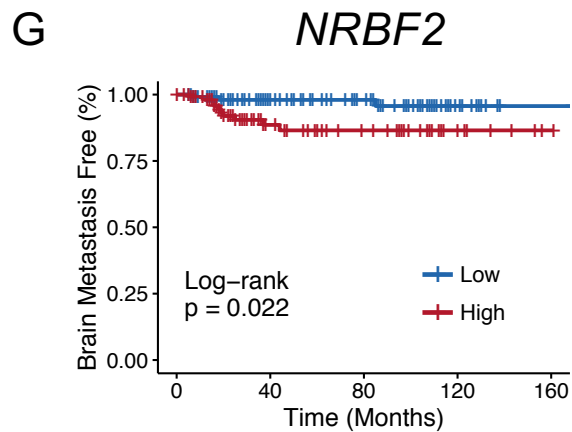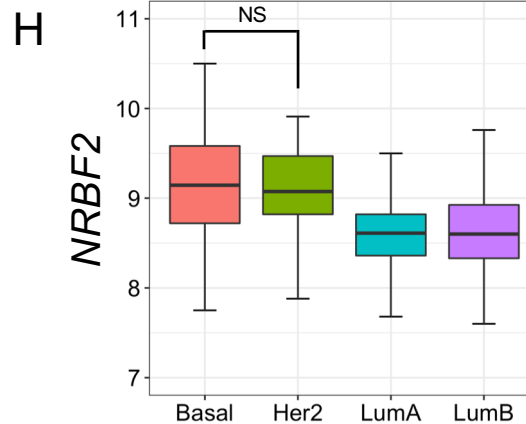

Supplemental Figure 6

### A *RUNX2* Basal

Strata  
+ quant=Low  
+ quant=High

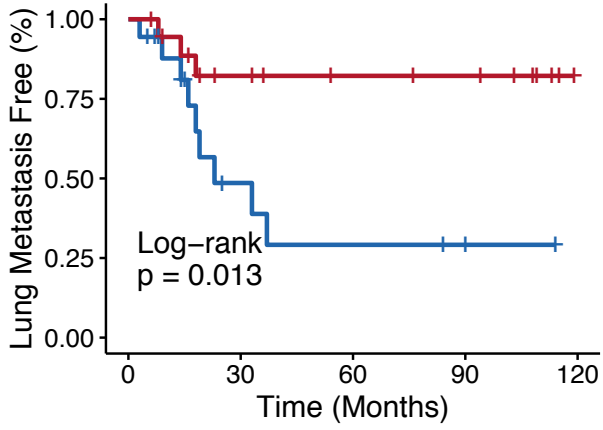

### B *JUN* Basal

Strata  
+ quant=Low  
+ quant=High

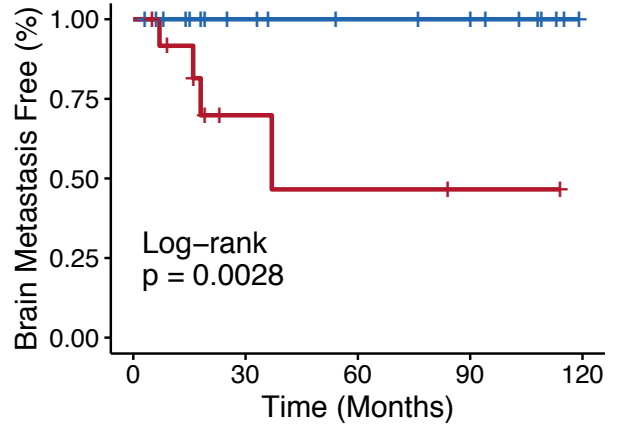

Supplement: 12920_2020_695_MOESM1_ESM.pdf [file 12920_2020_695_MOESM1_ESM.pdf]
